# Supplementary material
Source: PubMed Central journal article supplement (PMC4918449)
Supplement: ismej2015242x1.pdf [file ismej2015242x1.pdf]

Supplementary Table S1. Activity of the total bacterial community (“Total Bact”) and AAP bacteria (“AAP Bact”) in light and dark leucine <sup>3</sup>H-incubations.

| <i>Lake</i> | <i>% Active cells</i> |           |             |           |                  |           |             |           | <i>Silver grain area (μm<sup>2</sup>)</i> |           |             |           |                  |           |             |           |
|-------------|-----------------------|-----------|-------------|-----------|------------------|-----------|-------------|-----------|-------------------------------------------|-----------|-------------|-----------|------------------|-----------|-------------|-----------|
|             | <i>Total Bact.</i>    |           |             |           | <i>AAP Bact.</i> |           |             |           | <i>Total Bact.</i>                        |           |             |           | <i>AAP Bact.</i> |           |             |           |
|             | <i>Light</i>          | <i>SE</i> | <i>Dark</i> | <i>SE</i> | <i>Light</i>     | <i>SE</i> | <i>Dark</i> | <i>SE</i> | <i>Light</i>                              | <i>SE</i> | <i>Dark</i> | <i>SE</i> | <i>Light</i>     | <i>SE</i> | <i>Dark</i> | <i>SE</i> |
| Bowker      | 2.25                  | 0.82      | 3.03        | 0.97      | 20.39            | 2.41      | 18.21       | 6.23      | 1.15                                      | 0.15      | 0.77        | 0.14      | 0.46             | 0.10      | 2.39        | 0.72      |
| Waterloo    | 6.79                  | 1.06      | 6.83        | 1.14      | 23.11            | 2.35      | 19.09       | 4.19      | 0.95                                      | 0.03      | 1.29        | 0.16      | 1.38             | 0.44      | 2.59        | 0.77      |
| Magog       | 44.19                 | 3.01      | 24.26       | 4.00      | 58.36            | 3.76      | 42.77       | 4.28      | 1.02                                      | 0.02      | 0.86        | 0.13      | 2.05             | 0.28      | 1.58        | 0.33      |
| Coulombe    | 16.03                 | 2.22      | 11.96       | 1.53      | 32.74            | 5.71      | 15.95       | 1.45      | 1.48                                      | 0.13      | 1.68        | 0.30      | 1.99             | 0.31      | 3.81        | 1.50      |
| Aylmer      | 10.14                 | 0.45      | 7.56        | 0.20      | 26.64            | 2.03      | 22.6        | 2.99      | 0.86                                      | 0.08      | 0.92        | 0.14      | 1.28             | 0.20      | 1.03        | 0.26      |
| Nicolet     | 19.17                 | 6.84      | 17.83       | 3.36      | 36.65            | 18.10     | 28.13       | 6.18      | 1.69                                      | 0.53      | 1.60        | 0.03      | 4.71             | 0.47      | 3.53        | 0.96      |
| Croche      | 25.93                 | 1.45      | 16.35       | 1.35      | 35.7             | 1.73      | 26.1        | 4.47      | 2.82                                      | 0.30      | 2.63        | 0.19      | 4.75             | 0.74      | 4.35        | 1.10      |
